# Supplementary material for: Naturopathic Medicine for Endometriosis (NatME). Results of a pilot study
Source: Research Square preprint supplement (doi:10.21203/rs.3.rs-7396031/v1), 2025-10-27
Supplement: Supplementary file 1 [file 08cacfd0ed2abc058a95179d.docx]

Gerontakos et al. NatME Pilot Study – Additional File 1

Tables 4-9

**Table 4. Endometriosis Health Profile (EHP-5) results**

| **Variable (EHP5)** | **Timepoint** | **Mean (SD)** | **Median (IQR)** | **Range (min,max)** | **Friedman’s test p-value** | **Pairing** | **Adjusted p-value*** |
| --- | --- | --- | --- | --- | --- | --- | --- |
| **Pain** | **Baseline** | 2.81 (1.11)  2.44 (0.89)  2.19 (1.03) | 3.00 (2, 4)  2.00 (2, 3)  2.00 (1, 3) | 3 (1, 4)  3 (1, 4)  4 (1, 5) | 0.004 | **Baseline – end**  **Baseline – f/up**  **End – f/up** | 0.025a  0.003a  0.090 |
| **End visit** |
| **Follow up** |
| **Control and powerlessness** | **Baseline** | 3.44 (1.12)  2.63 (0.92)  2.48 (1.05) | 4.00 (3, 4)  3.00 (2, 3)  2.00 (2, 3) | 4 (1, 5)  4 (1, 5)  4 (1, 5) | <0.001 | **Baseline – end**  **Baseline – f/up**  **End – f/up** | <0.003a  <0.003a  1.236 |
| **End visit** |
| **Follow up** |
| **Emotional wellbeing** | **Baseline** | 3.59 (0.93)  3.22 (1.08)  3.04 (0.94) | 4.00 (3, 4)  3.00 (3, 4)  3.00 (2, 4) | 4 (1, 5)  4 (1, 5)  4 (1, 5) | 0.005 | **Baseline – end**  **Baseline – f/up**  **End – f/up** | 0.054  0.036a  1.353 |
| **End visit** |
| **Follow up** |
| **Social support** | **Baseline** | 3.81 (0.87)  2.81 (0.92)  2.85 (1.13) | 4.00 (3, 4)  3.00 (2, 4)  3.00 (2, 4) | 4 (1, 5)  3 (1, 4)  4 (1, 5) | <0.001 | **Baseline – end**  **Baseline – f/up**  **End – f/up** | <0.003a  <0.003a  2.418 |
| **End visit** |
| **Follow up** |
| **Self-image** | **Baseline** | 4.07 (0.78)  3.30 (0.99)  3.33 (0.92) | 4.00 (4, 5)  4.00 (3, 4)  3.00 (3, 4) | 3 (2, 5)  4 (1, 5)  3 (2, 5) | <0.001 | **Baseline – end**  **Baseline – f/up**  **End – f/up** | 0.009a  0.006a  2.346 |
| **End visit** |
| **Follow up** |

***** After applying the post-hoc Wilcoxon test with Bonferroni correction test **a** Significant finding p<0.05

**Table 5.** **Health-related Quality of Life (SF12) Results (ordinal variables)**

| **Variable (SF12 ordinal variables)** | **Timepoint** | **Mean (SD)** | **Median (IQR)** | **Range (min,max)** | **Friedmans’ test p-value** | **Pairing** | **Adjusted p-value*** |
| --- | --- | --- | --- | --- | --- | --- | --- |
| **Item 1**  **General Health** | **Baseline** | 3.52 (0.97)  3.07 (0.61)  2.96 (0.64) | 3.00 (3, 4)  3.00 (3, 3)  3.00 (3, 3) | 3 (2, 5)  2 (2, 4)  3 (2, 5) | 0.016 | **Baseline – end**  **Baseline – f/up**  **End – f/up** | 0.051  0.024a  0.771 |
| **End visit** |
| **Follow up** |
| **Item 2**  **Activities** | **Baseline** | 2.19 (0.55)  2.44 (0.57)  2.41 (0.57) | 2.00 (2, 3)  2.00 (2, 3)  2.00 (2, 3) | 2 (1, 3)  2 (1, 3)  2 (1, 3) | 0.144 | **Baseline – end**  **Baseline – f/up**  **End – f/up** | 0.213  0.327  2.217 |
| **End visit** |
| **Follow up** |
| **Item 3**  **Climbing Stairs** | **Baseline** | 2.11 (0.69)  2.22 (0.69)  2.41 (0.57) | 2.00 (2, 3)  2.00 (2, 3)  2.00 (2, 3) | 2 (1, 3)  2 (1, 3)  2 (1, 3) | 0.117 | **Baseline – end**  **Baseline – f/up**  **End – f/up** | 1.617  0.222  0.498 |
| **End visit** |
| **Follow up** |
| **Item 8**  **Pain (work)** | **Baseline** | 3.33 (0.92)  2.59 (1.08)  2.37 (1.04) | 3.00 (3, 4)  2.00 (2, 3)  2.00 (2, 3) | 3 (2, 5)  4 (1, 5)  4 (1, 5) | <0.001 | **Baseline – end**  **Baseline – f/up**  **End – f/up** | 0.015a  <0.003a  1.092 |
| **End visit** |
| **Follow up** |
| **Item 9**  **Feeling Calm** | **Baseline** | 4.26 (1.16)  3.44 (0.84)  3.63 (0.96) | 4.00 (3, 5)  4.00 (3, 4)  4.00 (3, 4) | 4 (2, 6)  3 (2, 5)  4 (2, 6) | <0.001 | **Baseline – end**  **Baseline – f/up**  **End – f/up** | <0.003a  0.018a  0.906 |
| **End visit** |
| **Follow up** |
| **Item 10**  **Energy** | **Baseline** | 4.74 (0.94)  3.96 (0.98)  3.70 (1.06) | 5.00 (4, 5)  4.00 (3, 5)  4.00 (3, 4) | 3 (3, 6)  4 (2, 6)  4 (2, 6) | <0.001 | **Baseline – end**  **Baseline – f/up**  **End – f/up** | <0.003a  <0.003a  0.774 |
| **End visit** |
| **Follow up** |
| **Item 11**  **Feeling Downhearted** | **Baseline** | 3.81 (1.41)  4.04 (1.40)  4.44 (1.12) | 4.00 (3, 5)  4.00 (3, 5)  5.00 (4, 5) | 5 (1, 6)  5 (1, 6)  5 (1, 6) | 0.019 | **Baseline – end**  **Baseline – f/up**  **End – f/up** | 1.26  0.021a  0.159 |
| **End visit** |
| **Follow up** |
| **Item 12**  **Social activities** | **Baseline** | 3.30 (1.29)  4.15 (1.16)  4.11 (1.42) | 3.00 (2, 4)  4.00 (3, 5)  4.00 (3, 5) | 5 (1, 6)  4 (2, 6)  5 (1, 6) | 0.020 | **Baseline – end**  **Baseline – f/up**  **End – f/up** | 0.018a  0.021a  2.949 |
| **End visit** |
| **Follow up** |

***** Calculated by applying the post-hoc Wilcoxon test with Bonferroni correction test **a** Significant finding p<0.05

**Table 6. Health-related Quality of Life (SF12) Results (nominal variables)**

| **Variable (SF12 nominal variables)** | **Timepoint** | **Yes, n (%)** | **No, n (%)** | **Cochran Q test p-value** | **Pairing** | **Adjusted  p-value*** |
| --- | --- | --- | --- | --- | --- | --- |
| **Item 4 Accomplishment (physical health)** | **Baseline End visit Follow up** | 25 (92.6%) 18 (66.7%) 17 (63.0%) | 2 (7.4%) 9 (33.3%) 10 (37.0%) | 0.022 | **Baseline – end**  **Baseline – f/up**  **End – f/up** | 0.1950.024a 3.00 |
| **Item 5 Limitations (physical health)** | **Baseline End visit Follow up** | 22 (81.5%) 15 (55.6%) 14 (51.9%) | 5 (18.5%) 12 (44.4%) 13 (48.1%) | 0.035 | **Baseline – end**  **Baseline – f/up**  **End – f/up** | 0.1950.1713.00 |
| **Item 6 Accomplishment (emotional problems)** | **Baseline End visit Follow up** | 18 (66.7%) 14 (51.9%) 14 (51.9%) | 9 (33.3%) 13 (48.1%) 13 (48.1%) | 0.390 | **Baseline – end**  **Baseline – f/up**  **End – f/up** | 1.164 1.272 3.00 |
| **Item 7 Carefulness (emotional problems)** | **Baseline End visit Follow up** | 17 (63.0%) 15 (55.6%) 11 (40.7%) | 10 (37.0%) 12 (44.4%) 16 (59.3%) | 0.174 | **Baseline – end**  **Baseline – f/up**  **End – f/up** | 2.262 0.438 1.032 |

***** Calculated by applying the post-hoc McNemar test with Bonferroni correction test
a Significant finding p<0.05

**Table 7. Pain Catastrophizing Scale (PCS) results**

| **Variable (PCS)** | **Timepoint** | **Mean (SD)** | **Median (IQR)** | **Range (min,max)** | **Friedman’s test p-value** | **Pairing** | **Adjusted p-value*** |
| --- | --- | --- | --- | --- | --- | --- | --- |
| **Item 1**  **Worry whether the pain will end** | **Baseline** | 1.93 (1.20)  1.15 (0.98)  1.07 (1.03 | 2.00 (1, 3)  1.00 (0, 2)  1.00 (0, 1) | 4 (0, 4)  3 (0, 3)  4 (0, 4) | <0.001 | **Baseline – end**  **Baseline – f/up**  **End – f/up** | 0.006a  0.006a  1.851 |
| **End visit** |
| **Follow up** |
| **Item 2**  **Feel I can’t go on** | **Baseline** | 1.15 (1.19)  0.78 (1.12)  0.67 (0.96) | 1.00 (0, 2)  0.00 (0, 1)  0.00 (0, 1) | 4 (0, 4)  4 (0, 4)  4 (0, 4) | 0.005 | **Baseline – end**  **Baseline – f/up**  **End – f/up** | 0.06  0.015a  1.362 |
| **End visit** |
| **Follow up** |
| **Item 3**  **Terrible and never going to get better** | **Baseline** | 1.81 (1.11)  0.85 (0.81)  1.00 (1.00) | 2.00 (1, 3)  1.00 (0, 1)  1.00 (0, 1) | 4 (0, 4)  3 (0, 3)  4 (0, 4) | <0.001 | **Baseline – end**  **Baseline – f/up**  **End – f/up** | <0.003a  0.021a  0.618 |
| **End visit** |
| **Follow up** |
| **Item 4**  **Awful and feel it overwhelms me** | **Baseline** | 1.93 (1.10)  1.22 (1.01)  1.19 (1.00) | 2.00 (1, 3)  1.00 (1, 2)  1.00 (1, 2) | 4 (0, 4)  4 (0, 4)  4 (0, 4) | <0.001 | **Baseline – end**  **Baseline – f/up**  **End – f/up** | 0.015a  0.006a  2.217 |
| **End visit** |
| **Follow up** |
| **Item 5**  **Can’t stand it anymore** | **Baseline** | 1.78 (1.39)  0.96 (1.25)  1.00 (1.17) | 2.00 (0, 3)  0.00 (0, 2)  1.00 (0, 2) | 4 (0, 4)  4 (0, 4)  4 (0, 4) | <0.001 | **Baseline – end**  **Baseline – f/up**  **End – f/up** | 0.006a  0.006a  2.115 |
| **End visit** |
| **Follow up** |
| **Item 6**  **Afraid the pain will get worse** | **Baseline** | 1.93 (1.32)  1.37 (0.92)  1.26 (1.13) | 2.00 (1, 3)  1.00 (1, 2)  1.00 (0, 2) | 4 (0, 4)  3 (0, 3)  4 (0, 4) | 0.005 | **Baseline – end**  **Baseline – f/up**  **End – f/up** | 0.084  0.033a  1.623 |
| **End visit** |
| **Follow up** |
| **Item 7**  **Thinking of other painful events** | **Baseline** | 1.44 (1.18)  0.67 (0.92)  0.81 (1.00) | 1.00 (0, 3)  0.00 (0, 1)  1.00 (0, 1) | 3 (0, 3)  3 (0, 3)  4 (0, 4) | <0.001 | **Baseline – end**  **Baseline – f/up**  **End – f/up** | 0.006a  0.024a  1.347 |
| **End visit** |
| **Follow up** |
| **Item 8**  **Anxiously want the pain to go away** | **Baseline** | 1.93 (1.20)  1.41 (1.33)  1.00 (1.10) | 2.00 (1, 3)  1.00 (0, 2)  1.00 (0, 2) | 4 (0, 4)  4 (0, 4)  4 (0, 4) | <0.001 | **Baseline – end**  **Baseline – f/up**  **End – f/up** | 0.087  <0.003a  0.078 |
| **End visit** |
| **Follow up** |
| **Item 9**  **Can’t keep it out of my mind** | **Baseline** | 1.70 (1.13)  1.15 (1.19)  1.04 (1.19) | 2.00 (1, 3)  1.00 (0, 2)  1.00 (0, 2) | 4 (0, 4)  4 (0, 4)  4 (0, 4) | 0.001 | **Baseline – end**  **Baseline – f/up**  **End – f/up** | 0.018a  0.015a  1.317 |
| **End visit** |
| **Follow up** |
| **Item 10**  **Thinking about how much it hurts** | **Baseline** | 1.70 (1.13)  1.04 (1.28)  1.04 (1.16) | 2.00 (1, 3)  1.00 (0, 2)  1.00 (0, 2) | 4 (0, 4)  4 (0, 4)  4 (0, 4) | <0.001 | **Baseline – end**  **Baseline – f/up**  **End – f/up** | 0.003a  0.006a  3.000 |
| **End visit** |
| **Follow up** |
| **Item 11**  **Thinking how badly I want the pain to stop** | **Baseline** | 1.85 (1.23)  1.26 (1.40)  1.15 (1.23) | 2.00 (1, 3)  1.00 (0, 3)  1.00 (0, 2) | 4 (0, 4)  4 (0, 4)  4 (0, 4) | <0.001 | **Baseline – end**  **Baseline – f/up**  **End – f/up** | 0.042a  0.012a  1.344 |
| **End visit** |
| **Follow up** |
| **Item 12**  **Nothing I can do to reduce intensity of pain** | **Baseline** | 1.63 (1.14)  1.04 (0.94)  0.85 (0.94) | 2.00 (1, 3)  1.00 (0, 1)  1.00 (0, 1) | 4 (0, 4)  3 (0, 3)  4 (0, 4) | <0.001 | **Baseline – end**  **Baseline – f/up**  **End – f/up** | 0.012a  <0.003a  0.498 |
| **End visit** |
| **Follow up** |
| **Item 13**  **Wonder if something serious may hap** | **Baseline** | 1.70 (1.17)  1.22 (1.12)  1.11 (1.05) | 2.00 (1, 2)  1.00 (0, 2)  1.00 (0, 2) | 4 (0, 4)  4 (0, 4)  4 (0, 4) | 0.007 | **Baseline – end**  **Baseline – f/up**  **End – f/up** | 0.045a  0.015a  1.362 |
| **End visit** |
| **Follow up** |

***** Calculated by applying the post-hoc Wilcoxon test with Bonferroni correction test **a** Significant finding p<0.05

**Table 8. Sexual Health Outcomes for Women Questionnaire (SHOW-Q) results**

| **Variable (SHOW-Q)** | **Timepoint** | **Mean (SD)** | **Median (IQR)** | **Range (min,max)** | **Friedmans’ test p-value** | **Pairing** | **Adjusted p-value*** |
| --- | --- | --- | --- | --- | --- | --- | --- |
| **Item 1**  **Satisfaction with frequency** | **Baseline** | 3.41 (1.36)  2.89 (1.15)  2.70 (1.20) | 4.00 (2, 4)  3.00 (2, 4)  3.00 (2, 4) | 4 (1, 5)  4 (1, 5)  4 (1, 5) | 0.006 | **Baseline – end**  **Baseline – f/up**  **End – f/up** | 0.183  0.018a  1.122 |
| **End visit** |
| **Follow up** |
| **Item 2**  **Satisfaction with ability to have/enjoy sex** | **Baseline** | 3.81 (1.27)  3.00 (1.33)  2.81 (1.41) | 4.00 (3, 5)  3.00 (2, 4)  3.00 (2, 4) | 5 (1, 6)  5 (1, 6)  5 (1, 6) | <0.001 | **Baseline – end**  **Baseline – f/up**  **End – f/up** | 0.003a  0.006a  1.260 |
| **End visit** |
| **Follow up** |
| **Item 3**  **Orgasm (frequency)** | **Baseline** | 3.56 (1.21)  3.81 (1.30)  4.22 (1.28) | 4.00 (3, 4)  4.00 (3, 5)  4.00 (3, 5) | 5 (1, 6)  5 (1, 6)  5 (1, 6) | 0.181 | **Baseline – end**  **Baseline – f/up**  **End – f/up** | 1.062  0.099  0.879 |
| **End visit** |
| **Follow up** |
| **Item 4**  **Satisfaction (frequency)** | **Baseline** | 3.56 (1.21)  3.78 (1.31)  4.30 (1.17) | 4.00 (2, 5)  4.00 (3, 5)  4.00 (3, 5) | 4 (2, 6)  5 (1, 6)  4 (2, 6) | 0.035 | **Baseline – end**  **Baseline – f/up**  **End – f/up** | 1.068  0.030a  0.489 |
| **End visit** |
| **Follow up** |
| **Item 5**  **Intensity (orgasm)** | **Baseline** | 2.52 (1.01)  2.44 (1.01)  2.59 (1.04) | 3.00 (2, 3)  3.00 (2, 3)  3.00 (2, 3) | 3 (1, 4)  3 (1, 4)  3 (1, 4) | 0.646 | **Baseline – end**  **Baseline – f/up**  **End – f/up** | 1.881  1.521  1.452 |
| **End visit** |
| **Follow up** |
| **Item 6**  **Difficulty (orgasm)** | **Baseline** | 2.63 (1.24)  2.37 (1.44)  2.48 (1.36) | 2.00 (2, 3)  2.00 (1, 3)  2.00 (1, 3) | 4 (1, 5)  4 (1, 5)  4 (1, 5) | 0.315 | **Baseline – end**  **Baseline – f/up**  **End – f/up** | 0.726  1.227  2.043 |
| **End visit** |
| **Follow up** |
| **Item 7**  **Interest** | **Baseline** | 3.22 (1.08)  2.93 (1.14)  3.07 (1.38) | 3.00 (2, 4)  3.00 (2, 4)  4.00 (2, 4) | 4 (1, 5)  4 (1, 5)  4 (1, 5) | 0.393 | **Baseline – end**  **Baseline – f/up**  **End – f/up** | 0.468  1.410  1.473 |
| **End visit** |
| **Follow up** |
| **Item 8**  **Desire (frequency)** | **Baseline** | 2.70 (1.29)  2.81 (1.11)  2.89 (1.12) | 2.00 (2, 3)  3.00 (2, 3)  3.00 (2, 3) | 4 (1, 5)  4 (1, 5)  4 (1, 5) | 0.309 | **Baseline – end**  **Baseline – f/up**  **End – f/up** | 0.744  1.140  1.851 |
| **End visit** |
| **Follow up** |
| **Item 9**  **Enjoyment (inability)** | **Baseline** | 3.23 (1.17)  2.81 (1.26)  2.81 (1.44) | 3.00 (2, 4)  2.50 (2, 4)  3.00 (1.75, 4) | 4 (1, 5)  4 (1, 5)  4 (1, 5) | 0.214 | **Baseline – end**  **Baseline – f/up**  **End – f/up** | 0.348  0.426  2.511 |
| **End visit** |
| **Follow up** |
| **Item 10**  **Bleeding (interference)** | **Baseline** | 2.22 (1.28)  1.56 (0.97)  1.70 (0.99) | 2.00 (1, 3)  1.00 (1, 2)  1.00 (1, 3) | 4 (1, 5)  4 (1, 5)  3 (1, 4) | 0.016 | **Baseline – end**  **Baseline – f/up**  **End – f/up** | 0.042a  0.138  1.311 |
| **End visit** |
| **Follow up** |
| **Item 11**  **Pelvic pain (interference)** | **Baseline** | 3.41 (1.21)  3.00 (1.35)  2.59 (1.15) | 4.00 (3, 4)  3.00 (2, 4)  2.00 (2, 4) | 4 (1, 5)  4 (1, 5)  4 (1, 5) | 0.002 | **Baseline – end**  **Baseline – f/up**  **End – f/up** | 0.153  <0.003a  0.144 |
| **End visit** |
| **Follow up** |
| **Item 12**  **Pelvic problems (interference)** | **Baseline** | 3.56 (1.18)  3.07 (1.32)  2.56 (1.15) | 4.00 (3, 4)  3.00 (2, 4)  2.00 (2, 4) | 4 (1, 5)  4 (1, 5)  4 (1, 5) | <0.001 | **Baseline – end**  **Baseline – f/up**  **End – f/up** | 0.060  <0.003a  0.033 |
| **End visit** |
| **Follow up** |

***** Calculated by applying the post-hoc Wilcoxon test with Bonferroni correction test **a** Significant finding p<0.05

**Table 9. Measure Yourself Medical Outcomes Profile (MYMOP) results**

| **Variable (MYMOP)** | **Timepoint** | **Mean (SD)** | **Median (IQR)** | **Range (min,max)** | **Friedman’s test p-value** | **Pairing** | **Adjusted p-value*** |
| --- | --- | --- | --- | --- | --- | --- | --- |
| **Symptom 1 Severity** | **Baseline** | 3.85 (1.35)  2.52 (1.42)  2.41 (1.30) | 4.00 (3, 5)  3.00 (1, 3)  2.00 (2, 3) | 6 (0, 6)  5 (0, 5)  6 (0, 6) | <0.001 | **Baseline – end**  **Baseline – f/up**  **End – f/up** | 0.006a  0.006a  1.770 |
| **End visit** |
| **Follow up** |
| **Symptom 2 Severity** | **Baseline** | 4.04 (1.45)  2.20 (1.44)  2.28 (1.27) | 4.00 (3, 5)  3.00 (1, 3)  2.00 (2, 3) | 6 (0, 6)  4 (0, 4)  6 (0, 6) | <0.001 | **Baseline – end**  **Baseline – f/up**  **End – f/up** | <0.003a  <0.003a  2.547 |
| **End visit** |
| **Follow up** |
| **Activity** | **Baseline** | 3.74 (1.34)  2.74 (1.43)  2.41 (1.42) | 4.00 (3, 5)  3.00 (2, 3)  2.00 (2, 3) | 6 (0, 6)  6 (0, 6)  6 (0, 6) | <0.001 | **Baseline – end**  **Baseline – f/up**  **End – f/up** | 0.012a  <0.003a  1.098 |
| **End visit** |
| **Follow up** |
| **Wellbeing** | **Baseline** | 4.00 (1.14)  2.44 (1.25)  2.22 (1.18) | 4.00 (3, 5)  3.00 (2, 3)  2.00 (2, 3) | 5 (1, 6)  5 (0, 5)  6 (0, 6) | <0.001 | **Baseline – end**  **Baseline – f/up**  **End – f/up** | <0.003a  <0.003a  1.056 |
| **End visit** |
| **Follow up** |

***** Calculated by applying the post-hoc Wilcoxon test with Bonferroni correction test **a** Significant finding p<0.05
