# Supplementary material for: Naturopathic Medicine for Endometriosis (NatME). Results of a pilot study
Source: Research Square preprint supplement (doi:10.21203/rs.3.rs-7396031/v1), 2025-10-27
Supplement: Supplementary file 2 [file 356793d5684e5c53eefc912c.docx]

**Table A1. Session 6 week 12 NatME program verbal feedback run sheet**

| Tell me about your experiences of participating in this program? |  |
| --- | --- |
| What was the most successful part of the program for you? | - What did you like about the program?   - What were your favourite aspects? - What successes did you experience? |
| What was the most challenging part of the program for you? | - What did not go well for you? - What did you dislike about the program? - What were the barriers for you? (e.g. transport, child care etc.) - What changes, if any, would you like to see to the program?   - What do you think would improve the program? |
| How did this to compare to what you were expecting? |  |
| What impact has the program had on you and your health? | - What were the biggest changes you observed over the course of the program? |
