# Supplementary material for: Naturopathic Medicine for Endometriosis (NatME). Results of a pilot study
Source: Research Square preprint supplement (doi:10.21203/rs.3.rs-7396031/v1), 2025-10-27
Supplement: Supplementary file 3 [file 9202c865ff6266303a3cfd54.docx]

**Table A2. NatME participant quotes from verbal feedback during end visit**

| **Learning, knowledge and empowerment** | **S3 “**Having the knowledge you feel like you're in charge of your own body”  **S1 “**Bringing that knowledge to light that there is a connection between what I'm eating and the pain that I'm getting, that was a really big eye opener”  **S4** “If you’re new to endo there's all the educational topics and strategies and ideas of what other professionals to see, but then for us who've been on that journey for a long time, there's still a lot that we've learnt and put together and then have fresh ideas and recommendations of where to go from here. What I got out of it and the content was what I expected, but just way better than I could have imagined”  **S7** “What I love is the educational part like. Education and information empowers you. Like once you know what's happening, you understand what's going on in your body. You can take that power”  **S8 “**Now I understand how everything is connecting. So I feel like that allows me to make better decisions”  **S13** “Seeing how you can take your health into your own hands.. ..that really is empowering”  **S17** “It's made me more aware of my choices and the impact they have”  **S14** “I'm more empowered, because I now have a lot of knowledge”  **S19 “**I really enjoyed that educational part because the more we know the more we understand ourselves”  **S23** “I found it really helpful to learn from everyone else's experience”  **S26** “I'm leaving feeling empowered to keep going”  **S4** “The program was what I expected, but way exceeding my expectations.  **S20** “It exceeded expectations. Just meeting all of you and all the knowledge, and everything that's happened the last few weeks has definitely been more than I could have asked for, so excellent” |
| --- | --- |
| **Personalised and group support** | **S4** “Such individualised recommendations as well, so that we had the benefit of the group, but then it was tailored to what we each need”  **S9** “It's like a relief to get that off my chest and see if someone else is going through the same thing, you know I actually looked forward to being able to talk about it”  **S8** “Everyone else sharing, so that then I feel like I'm not so crazy”  **S7** “It's also really nice hearing everyone else's success story”  **S13** “That was nice that you actually consult with each person”  **S18** “I really enjoyed the group aspect and getting to hang out with a bunch of people that actually get what's going on with you”  **S22** “Feeling so validated and heard”  **S2** “I often would go back home and feel a lot lighter. I felt lighter knowing that there were other people out there that that are going through similar issues |
| **Program structure** | **S4 “**The two weeks was a good length of time to have like a short goal, and the goal collaboratively was achievable for the two weeks. And it kept me on track to reach that goal. And also then having the 12 weeks”  **S5 “**I think that two week cycle just really worked to absorb all the education and implement change”  **S1 “**I think as well, having a check-in at another six weeks maybe not face to face necessarily, but where you were contacted or a Zoom or something just six weeks after would be good”  **S22** “Even though it's two hours, it doesn't feel exhausting; it feels kind of quite energizing really to be able to share”  **S18** [online participant] “I just have so much respect for you {Naturopath} and {Facilitator} for setting up what feels like such a warm space because usually it would feel so disconnected {on screen}, but I think the way that you've set up the program has helped with that a lot” |
| **A safe space** | **S8** “It was very much a safe space, you know, some days I came in my pyjamas and went back home feeling great”  **S6** “Just knowing that you're in an environment where people actually understand and it's okay to be in pain, I didn't have to pretend to be someone else, I could just sit there and just get lifted up by everyone else”  **S2 “**Yeah, a safe space”  **S9** “It's a very safe space”  **S12** “The fact that we could feel comfortable talking about things, we felt really comfortable”  **S26** “You go away feeling good, you don't have to overthink what you've said; it just is done in a really great way that's not detrimental to mental health”  **S18** “It's been something that I've like looked forward to doing every two weeks. I just didn't expect it to be such a warm environment” |
| **Clinical improvements** | **S5** “So like fatigue gone. I haven't had fatigue since making the changes”  **S6** “I thought I knew my diet pretty well and how it affected my body, I didn't expect it to come out with really good outcomes”  **S9** “That whole wholesome feeling that we leave here with.. ..it’s made my mental health a lot stronger on the days that are really hard, it’s that you're actually not alone”  **S12** “The improvements that I've been seeing week to week have been awesome”  **S13** “Reduction in pain has been really good”  **S14** “Less pain and less medication”  **S25** “My pain has significantly decreased, and my fatigue was really bad, I was basically just trying to get up enough energy on the weekends to be able to go to work and pay my bills. But this is the best I have felt in years”  **S23** “I think improving my digestion has improved my pain” |
| **Barriers and challenges** | **S2** “Sometimes the motivation to get here, not because I didn't want to be here, but because I've just spent a whole day at work”  **S3** “Traffic was a barrier”  **S2** “Maybe the ability to link in with a zoom if you can't actually physically be here would be good”  **S9 “**Yeah, the flu {barrier}. So if there was a way to join {remotely}, even just to you know, call on someone's phone just to listen” |
